1 **Mapping and DNA sequence characterisation of the *Ry<sub>sto</sub>* locus conferring**  
2 **extreme virus resistance to potato cultivar ‘White Lady’**

3  
4 **Mihály Kondrák<sup>1</sup>, Andrea Kopp<sup>1</sup>, Csilla Uri<sup>1</sup>, Anita Sós-Hegedűs<sup>1</sup>, Edina Csákvári<sup>1</sup>,**  
5 **Mátyás Schiller<sup>1</sup>, Endre Barta<sup>1</sup>, István Cernák<sup>2</sup>, Zsolt Polgár<sup>2</sup>, János Taller<sup>3</sup>, Zsófia**  
6 **Bánfalvi<sup>1\*</sup>**

7  
8 <sup>1</sup>NARIC Agricultural Biotechnology Institute, Szent-Györgyi A. u. 4, H-2100 Gödöllő,  
9 Hungary

10 <sup>2</sup>University of Pannonia, Potato Research Centre, Deák F. u. 16, H-8360 Keszthely, Hungary

11 <sup>3</sup>University of Pannonia, Georgikon Faculty, Department of Plant Sciences and  
12 Biotechnology, Deák F. u. 16, H-8360 Keszthely, Hungary

13  
14  
15 \*Corresponding author

16  
17 e-mail: [banfalvi.zsofia@abc.naik.hu](mailto:banfalvi.zsofia@abc.naik.hu)

18 Tel.: +36 28 526153

19 ORCID ID: 0000-0003-4729-4432

20

## 21 **Abstract**

22

23 Virus resistance genes carried by wild plant species are valuable resources for plant  
24 breeding. The *Ry<sub>sto</sub>* gene, conferring a broad spectrum of durable resistance, originated from  
25 *Solanum stoloniferum* and was introgressed into several commercial potato cultivars,  
26 including ‘White Lady’, by classical breeding. *Ry<sub>sto</sub>* was mapped to chromosome XII in  
27 potato, and markers used for marker-assisted selection in breeding programmes were  
28 identified. Nevertheless, there was no information on the identity of the *Ry<sub>sto</sub>* gene. To begin  
29 to reveal the identification of *Ry<sub>sto</sub>*, fine-scale genetic mapping was performed which, in  
30 combination with chromosome walking, narrowed down the locus of the gene to  
31 approximately 1 Mb. DNA sequence analysis of the locus identified six full-length *NBS-LRR*-  
32 type (short *NLR*-type) putative resistance genes. Two of them, designated *TMV2* and *TMV3*,  
33 were similar to a *TMV resistance* gene isolated from tobacco and to *Y-1*, which co-segregates  
34 with *Ry<sub>adg</sub>*, the extreme virus resistance gene originated from *Solanum andigena* and localised  
35 to chromosome XI. Furthermore, *TMV2* of ‘White Lady’ was found to be 95% identical at the  
36 genomic sequence level with the recently isolated *Ry<sub>sto</sub>* gene of the potato cultivar ‘Alicja’. In  
37 addition to the markers identified earlier, this work generated five tightly linked new markers  
38 which can serve potato breeding efforts for extreme virus resistance.

39

40

## 41 Introduction

42

43 For sustainable intensification of crop production, disease control should, when  
44 possible, be achieved using genetics rather than using costly recurrent chemical sprays. Wild  
45 relatives of crop plants are a good source of genes for disease resistance. Potato (*Solanum*  
46 *tuberosum*), the world's fourth most important food crop, following maize, wheat and rice,  
47 can be crossed with a number of wild *Solanum* species. Nevertheless, classical breeding for  
48 resistance is time-consuming, and it is extremely difficult to recover the parental combination  
49 necessary for beneficial alleles in the progeny. Thus, there is great value in genetic  
50 approaches that can improve disease resistance in potato varieties without disrupting  
51 favourable combinations of alleles [1].

52 One of the major factors adversely affecting potato production worldwide is virus  
53 infection. Viruses such as *Potato leafroll virus* (PLRV) and *Potato virus Y* (PVY) can affect  
54 yield substantially, with up to 80% losses, while viruses producing mild or latent symptoms,  
55 such as *Potato virus X* (PVX) and *Potato virus S* (PVS), show yield losses of at most 10 to  
56 20% [2]. Host plants can exhibit compatible or incompatible interactions with a virus. In a  
57 compatible interaction, potato plants can be either tolerant, accumulating high titres of the  
58 virus without symptoms, or sensitive, responding to viral infection with development of  
59 disease. In an incompatible interaction, the plants respond to viral infection with a  
60 hypersensitive reaction (HR) or an extreme resistance (ER) response. The HR is accompanied  
61 by programmed cell death and restricts virus multiplication and spreading. It manifests as  
62 necrotic lesions on inoculated leaves and leads to the induction of systemic acquired  
63 resistance. The HR is strain-specific and affected by environmental factors (e.g. heat),  
64 whereas ER acts against a broad spectrum of virus strains by limiting their accumulation, and  
65 only a few or no visible symptoms appear [3]. In potato, HR correlates with the presence of *N*  
66 genes, while ER is manifested by *R* genes [4].

67 Although a relatively large number of virus-resistance genes have been mapped to  
68 various chromosomes in potato [5], only a very few of them were isolated and characterised at  
69 the DNA sequence level. The first one was the dominant gene *Rx1*, controlling ER to PVX,  
70 followed by *Rx2*. Despite their different origins (*S. andigena* and *S. acaule*) and chromosomal  
71 locations (XII and V), *Rx1* and *Rx2* share 95% sequence identity [6-8]. At the chromosome  
72 XII *Rx1* locus, there are at least three homologues of *Rx1* and the potato cyst nematode-  
73 resistance gene *Gpa2*, which is highly similar to *Rx1* [9]. Rx was identified as a protein with a

74 conserved nucleotide binding site and a leucine-rich repeat (NBS-LRR or, shortly, NLR)  
75 belonging to the largest class of plant R proteins that can mediate both HR and ER responses  
76 [10].

77 ER against PVY is conferred by *Ry* genes. As early as 1970, five *Ry* genes had been  
78 described [11], and three *Ry* genes have already been mapped on potato chromosomes. One of  
79 them originates from the wild species *S. tuberosum* ssp. *andigena* (*Ry<sub>adg</sub>*) and was mapped on  
80 chromosome XI [12]. Another one, derived from *S. chacoense* (*Ry<sub>chc</sub>*), is located on  
81 chromosome IX [13], while the third one, derived from *S. stoloniferum* (*Ry<sub>sto</sub>*), was mapped to  
82 chromosome XII [14-16]. A gene, designated *Y-1*, co-segregating with *Ry<sub>adg</sub>*, was cloned and  
83 found to be structurally similar to gene *N* that confers HR to *Tobacco mosaic virus* (TMV) in  
84 *Nicotiana* spp. and belongs to the Toll-interleukin-1 receptor (*TIR*)-type *NLR* genes [17]. A *Ry*  
85 gene similar to *Y-1* was isolated from the Korean potato cultivar ‘Golden Valley’ and  
86 introduced into the ‘Winter Valley’ cultivar which is susceptible to PVY<sup>O</sup> infection. The  
87 transgenic ‘Winter Valley’ showed resistance to PVY<sup>O</sup> infection [18]. In contrast, leaves of  
88 transgenic potato plants expressing *Y-1* under the control of the *CaMV-35S* promoter  
89 developed necrotic lesions upon infection with PVY, but no significant resistance was  
90 observed, and plants were systemically infected with the virus [17].

91 Both the environment and evolution modulate viral pathogenesis in plants and *R* genes  
92 are in many cases overcome by resistance-breaking strains [19,20]. *Ry<sub>sto</sub>* was introgressed into  
93 *S. tuberosum* almost 60 years ago, and various European potato cultivars currently bear *Ry<sub>sto</sub>*  
94 [21]. *Ry<sub>sto</sub>* was also introduced into *S. tuberosum* at the Potato Research Centre, Keszthely,  
95 Hungary. There has been no indication so far that even the most aggressive PVY strain, NTN,  
96 could overcome the ER of *Ry<sub>sto</sub>*-bearing potato cultivars [22], including the Hungarian cv.  
97 ‘White Lady’ [23]. This phenomenon of unusually durable resistance of *Ry<sub>sto</sub>*-bearing potatoes  
98 prompted us to map *Ry<sub>sto</sub>* on a fine scale and characterise the *Ry<sub>sto</sub>* locus at the DNA sequence  
99 level.

100

101

## 102 **Materials and methods**

103

### 104 **Plant materials and growth conditions**

105

106 Four hundred fifty-seven genotypes of the tetraploid F1 population described by [23]  
107 from a cross between cv. ‘White Lady’ and ‘S440’ were tested for segregation of the *Ry<sub>sto</sub>*  
108 gene. The parents and 81 hybrids were obtained from the Potato Research Centre, Keszthely,  
109 Hungary, as *in vitro* plants, while the others were grown from seeds. Seed surfaces were  
110 disinfected with 20% sodium hypochlorite for 10 min and rinsed with sterile water three  
111 times. Seeds were germinated on 1% water-agar Petri plates and placed into 35-ml tubes  
112 containing 7 ml RM medium (MS medium without vitamins) [24] containing 2% (w/v)  
113 sucrose, solidified with 0.8% agar. Tubes were closed with paper plugs. *In vitro* culturing was  
114 performed at 24°C under a light regime of 16 h of light at 75  $\mu\text{mol m}^{-2} \text{s}^{-1}$  intensity and 8 h of  
115 darkness. Propagation of the plants was carried out *in vitro*.

116

### 117 **Potato transformation**

118

119 For transformation, the potato cv. ‘Désirée’ was propagated *in vitro* in 500-ml jars in  
120 MS medium [24] containing 2% (w/v) sucrose and solidified with 0.8% agar (5 plants/jar).  
121 The recombinant vectors from *Escherichia coli* were introduced into *Agrobacterium*  
122 *tumefaciens* strain C58C1 containing pGV2260 [25] by triparental mating [26]. Transgenic  
123 ‘Désirée’ lines were generated by leaf transformation according to [27], with 50  $\mu\text{g ml}^{-1}$   
124 kanamycin added to the selection media.

125 In the case of the potato breeding line ‘S440’, tissue culture-derived sterile  
126 microtubers were used for transformation as described by [28] with the exception that the  
127 shoots were regenerated and rooted in the presence of 50  $\mu\text{g ml}^{-1}$  kanamycin in the media.  
128 Total DNA of putative transgenic plants grown in tissue culture was isolated by the method of  
129 [29] and the presence of target genes was verified by PCR using Dream Taq DNA Polymerase  
130 (Thermo Fisher Scientific, Waltham, MA, USA) and the gene-specific primers listed in S1  
131 Table with the exception of T2 lines for which a reverse transcription polymerase chain  
132 reaction (RT-PCR) was applied as detailed below. PCR-positive transgenic lines from each  
133 transformation were propagated *in vitro* and transferred to pots for virus resistance testing.

134

### 135 **Virus resistance testing**

136

137 For virus tests, four-week-old plants obtained by tissue culture in tubes were  
138 transferred into pots and grown further under greenhouse conditions at 20-28°C. After 2-3  
139 weeks, the plants were tested for resistance to PVY<sup>NTN</sup> by mechanical inoculation. PVY<sup>NTN</sup>

140 (DSMZ-Deutsche Sammlung von Microorganismen und Zellkulturen GmbH, virus isolate  
141 PV-0403) was propagated in *Nicotiana tabacum* cv. Xanthi. Two bottom leaves of potato  
142 plants were dusted with carborundum powder, and 100 µl of sap prepared from PVY<sup>NTN</sup>-  
143 infected tobacco plant leaves was dropped and dispersed with a micropipette tip onto each  
144 leaf. The sap was rubbed into the leaves using a pestle. Non-inoculated upper leaf samples  
145 were collected three weeks after inoculation. Detection of the virus was performed by RT-  
146 PCR. Total RNA was extracted from leaves according to the method of [30]. RNA was  
147 quantified using a NanoDrop spectrophotometer. DNaseI-treated total RNA (1 µg) was  
148 reverse-transcribed with RevertAid M-MuLV Reverse Transcriptase and 10xRT Random  
149 Primer (Applied Biosystems, Foster City, CA, USA). The cDNAs obtained with the PVY<sup>NTN</sup>  
150 coat protein gene-specific primers (S1 Table) were tested on agarose gel. Hybrids of the F1  
151 population, which appeared initially resistant, were re-tested twice in subsequent experiments.  
152 Transgenic ‘Désirée’ and ‘S440’ lines were tested for virus resistance in the same way using  
153 three plants per line in each experiment.

154

#### 155 **Cloning and sequencing of genetic markers**

156

157 Cernák et al. [31] developed RAPD markers linked to the *Ry<sub>sto</sub>* gene. The closest  
158 RAPD marker amplified from ‘White Lady’ genomic DNA was cloned into the pBluescript  
159 SK(+) (Stratagene, La Jolla, CA, USA) and sequenced on an ABI 3100 Genetic Analyser  
160 instrument (Biomi Ltd., Gödöllő, Hungary). The SCAR marker ST1 [32] is based on this  
161 sequence (S1 Fig.). The YES3-3A marker [33] was also amplified from ‘White Lady’, cloned  
162 in pGEM-T Easy (Promega, Madison, WI, USA) and sequenced at Biomi Ltd. (S2 Fig.).

163

#### 164 **Bacterial artificial chromosome (BAC) library construction and screening**

165

166 The BAC library was produced from ‘White Lady’ genomic DNA after partial  
167 digestion with *Hind*III in pIndigoBAC-5 at BIO S&T (Montreal, Canada). The total number  
168 of clones was 251,160 with an average insert size of 150 Kb. A PCR-based strategy was  
169 applied for the identification of BAC clones overlapping the *Ry<sub>sto</sub>* locus. The *Escherichia coli*  
170 DH10B carrying the BAC clones in SOC medium [34] supplemented with 12.5 µg ml<sup>-1</sup>  
171 chloramphenicol and 15% glycerol was diluted and divided into 868 x 96 subpools containing  
172 approximately 10 individuals each and grown at 37°C in microtiter plates before storage at -  
173 80°C. To prepare BAC DNA pools, 124 plates were organised into a composite 3 x 8 grid

174 containing 8 columns and 6 rows. Plasmid DNA was isolated from the 48 pooled samples by  
175 the alkaline-lysis method [34] and used as a template for PCR screening of the library. In the  
176 case of a positive result, pooled DNA was isolated from the three determined plates and then  
177 from the single identified plate. Finally, DNA was prepared and PCR-tested from individual  
178 wells. Bacteria of the positive well were plated out and tested individually. PCR primers were  
179 designed using Primer3Plus ([http://www.bioinformatics.nl/cgi-](http://www.bioinformatics.nl/cgi-bin/primer3plus/primer3plus.cgi/)  
180 [bin/primer3plus/primer3plus.cgi/](http://www.bioinformatics.nl/cgi-bin/primer3plus/primer3plus.cgi/)) and/or Primer-Blast NCBI  
181 (<http://www.ncbi.nlm.nih.gov/tools/primer-blast/>). After PCR, the products were analysed in  
182 an agarose gel.

183

#### 184 **Sequencing and bioinformatics analysis of BAC clones**

185

186 BAC clone DNA was isolated using a Large-Construct Kit (Qiagen, Hilden,  
187 Germany). Fragmentation, library production and Illumina MiSeq 2x300 bp sequencing were  
188 carried out at the Genomic Medicine and Bioinformatic Core Facility at the University of  
189 Debrecen, Hungary. Contig assembly was performed by the A5-miseq pipeline [35]. The raw  
190 sequence reads are deposited at the EBI ENA SRA database under the project number  
191 PRJEB31027. Publicly available sequence files and other data of potato *S. tuberosum* Group  
192 Phureja DM1-3 516R44 originally generated by the Potato Genome Sequencing Consortium  
193 [36] were obtained from the Solanaceae Genomics Resource  
194 [http://solanaceae.plantbiology.msu.edu/pgsc\\_download.shtml](http://solanaceae.plantbiology.msu.edu/pgsc_download.shtml). BAC reads were aligned into  
195 the reference genome Phureja using the BWA-MEM program [37]. Multiple sequence  
196 alignments were carried out by BLASTn (<https://blast.ncbi.nlm.nih.gov/>) and Clustal Omega  
197 (<https://www.ebi.ac.uk/Tools/msa/clustalo/>). The predictions of open reading frames and  
198 exon-intron boundaries were based on the GENSCAN webserver at MIT  
199 (<http://genes.mit.edu/GENSCAN.html>).

200

#### 201 **Cloning of candidate genes**

202

203 Cloning of candidate genes was based on PCR using the primers listed in S1 Table.  
204 Long-range PCR amplifications were performed using Phusion High-Fidelity DNA  
205 Polymerase (Thermo Fisher Scientific, Waltham, MA, USA). The *DisRes* fragment was  
206 cloned into the *SmaI* site of the binary vector pBin19, providing kanamycin resistance in  
207 transgenic plants [38]. In all other cases, the PCR primers were extended at the ends with



208 recognition sites for *Bam*HI and inserted into the *Bam*HI site of pBin19. The recombinant  
209 vectors were transformed into the *Escherichia coli* strain DH5 $\alpha$  [39].

210

211

## 212 **Results**

213

### 214 **Fine-scale genetic mapping of the *Ry<sub>sto</sub>* gene**

215

216 According to the previous result obtained by [31], the tetraploid potato cultivar ‘White  
217 Lady’ carries the *Ry<sub>sto</sub>* gene in simplex form. In this study, among the 457 tested F1 genotypes  
218 derived from a cross between ‘White Lady’ and ‘S440’, 220 resistant plants and 237 plants  
219 sensitive to PVY<sup>NTN</sup> infection were identified. The segregation ratio of 1:1 confirmed the  
220 presence of a single, dominant gene for extreme resistance to PVY<sup>NTN</sup> in simplex state in the  
221 tetraploid parental variety ‘White Lady’.

222 Molecular markers co-segregating with *Ry<sub>sto</sub>*, e.g., STM0003, YES3-3A, Cat-in2 and  
223 ST1, were identified earlier [16,31-33,40]. The closest markers to *Ry<sub>sto</sub>* in the genetic map of  
224 ‘White Lady’ were STM0003 and ST1 in a distance of 2.95 and 0.53 cM, respectively [31].  
225 Since STM0003 seemed to be too far from *Ry<sub>sto</sub>* to start chromosome walking towards the  
226 resistance gene a fine mapping was carried out by testing the co-inheritance of the above  
227 listed four molecular markers with the virus resistant/sensitive phenotype in 400 genotypes  
228 derived from the ‘White Lady’ x ‘S440’ cross. Seven recombinants between STM0003 and  
229 Cat-in2 were identified. Thus, the genetic distance between the two markers was estimated to  
230 be 1.75 cM. STM0003 at the proximal site and Cat-in2 at the distal site surrounded the *Ry<sub>sto</sub>*  
231 gene. Based on the recombinant events detected in the seven recombinants (Fig. 1), the order  
232 of the four markers, STM0003, YES3-3A, ST1 and Cat-in2, was established as shown in Fig.  
233 2.

234

235 **Fig. 1. Colourmap of the *Ry<sub>sto</sub>* region.** R, resistant; S, sensitive. The presence of markers  
236 representing the resistant parent ‘White Lady’ are indicated by red boxes, while the presence  
237 of markers representing the sensitive parent ‘S440’ are indicated by green boxes in seven  
238 genotypes of the F1 population. Published markers are red-coloured.

239

### 240 **Identification of supercontigs carrying the *Ry<sub>sto</sub>* locus**



241

242 The availability of the *S. tuberosum* Group Phureja genome sequence (Potato Genome  
243 Sequencing Consortium 2011) provided the possibility for physical mapping of the *Ry<sub>sto</sub>*  
244 locus. Browsing the PGSC database, we found the STM0003 marker on the supercontig  
245 PGSC0003DMB000000114. To position additional markers of the *Ry<sub>sto</sub>* locus on  
246 supercontigs, the ST1 and YES3-3A PCR fragments of ‘White Lady’ were cloned and  
247 sequenced (S1,2 Fig.). DNA sequence comparison localised YES3-3A to the same  
248 supercontig as STM0003, while ST1 identified PGSC0003DMB000000034.

249 The tomato (*S. lycopersicum*) genome sequence was also available in the database  
250 (The Tomato Genome Consortium, 2012), and we found that a large number of markers were  
251 localised to the tomato region orthologous to the identified potato supercontigs. Based on  
252 these tomato markers, 16 primer pairs were synthesised and tested; however, only one of  
253 them, designated SGN-U256066, showed polymorphism between ‘White Lady’ and ‘S440’.  
254 This marker was located between STM0003 and YES3A (Fig. 1 and 2).

255

256 **Fig. 2. Position of the *Ry<sub>sto</sub>* locus on chromosome XII.** The genetic distance in cM is shown  
257 on the right. The map distances for STM0003, SGN-U256066, YES3-3A, 1.365, Sec15,  
258 CadInd and Cat-in2 were calculated from recombination frequencies between DNA markers  
259 and resistance loci, whereas localisation of 1.156, DisRes, 1.110, ST1, and 1.109 were based  
260 on the Phureja genome sequence. Published markers are red-coloured.

261

## 262 **Isolation of BAC clones overlapping the *Ry<sub>sto</sub>* locus**

263

264 A BAC library was constructed from the genomic DNA of ‘White Lady’. Physical  
265 mapping started with screening the BAC library using the ST1 marker by which five positive  
266 BACs were identified (Fig. 3). In a subsequent experiment, YES3-3A identified one BAC  
267 clone (Fig. 3). The ends of the six positive BACs were sequenced. Sequences were mapped to  
268 the *S. tuberosum* Group Phureja genome sequence. The comparison localised the *Ry<sub>sto</sub>* locus  
269 to the 57-59 Mb segment of chromosome XII in Phureja. The obtained sequences were used  
270 for new marker development. A screen for markers in the intergenic regions successfully  
271 identified a polymorphic marker designated 1.365. Genetic mapping of 1.365 reduced the size  
272 of the *Ry<sub>sto</sub>* locus and localised *Ry<sub>sto</sub>* between Cat-in2 and 1.365 (Fig. 1, 2 and 3). To close the  
273 genetic window, further PCR primers were designed based on the Phureja genome sequence  
274 and tested for polymorphism between ‘White Lady’ and ‘S440’. Three new markers were

275 found in this way: CadInd, Sec15 and DisRes. Testing the six lines bearing recombination  
276 between Cat-in2 and 1.365 with the new markers, the *Ry<sub>sto</sub>* locus could be narrowed to the  
277 Sec15-1.365 fragment between 58 and 59 Mb (Figs. 1, 2 and 3). BAC walking was continued  
278 with Sec15, DisRes and 1.365 markers and resulted in the isolation of five new clones, two by  
279 DisRes and three by 1.365 (Fig. 3). No BACs were isolated by Sec15 in the 48 pooled  
280 samples tested. To close the gap between the isolated BAC clones, an attempt was made to  
281 identify new polymorphic markers based on the end sequences of BAC inserts. This attempt  
282 resulted in the identification of markers 1.109, 1.110 and 1.156 (Figs. 1 and 2). In comparison  
283 to the Phureja genome sequence, isolation of one BAC clone by 1.109 and another clone by  
284 1.110 closed the gap between the BACs overlapping the *Ry<sub>sto</sub>* locus (Fig. 3).

285

286 **Fig. 3. Physical map of the *Ry<sub>sto</sub>* locus with the overlapping BAC clones.** The *Ry<sub>sto</sub>* locus in  
287 the *S. tuberosum* cv. ‘White Lady’ corresponds to the 58-59-Mb region on chromosome XII  
288 in the genome-sequenced *S. tuberosum* Group Phureja DM1-3 516R44. This region of  
289 Phureja has sequence gaps probably due to its highly repetitive nature. Markers used for  
290 genetic mapping and isolation of BAC clones are indicated under the upper line illustrating  
291 the chromosomal fragment. BAC clones are represented by the horizontal lines with their  
292 names on them. The published markers and the fully sequenced BAC clones are highlighted  
293 in red. The numbers under the lines indicate the position of the BAC ends on the  
294 corresponding Phureja genome sequence. The position of BAC ends indicated by dashed lines  
295 could not be defined precisely because these segments possess a large number of repeated  
296 sequences.

297

### 298 **Selection of candidate genes by DNA sequence similarity**

299

300 Six presumably overlapping BAC clones, namely, 443B9, 109D9, 154G1, 164H4,  
301 156F6 and 626B1 (Fig. 3), were sequenced. The reads were *de novo* assembled both pooled  
302 and individually by the A5-miseq pipeline. The pooled BAC reads gave 49 contigs, which  
303 were greater than 3 Kb. The sum length of these contigs was 0.97 Mb out of which 0.38 Mb  
304 could be aligned to the ~1 Mb region of Phureja corresponding to the *Ry<sub>sto</sub>* locus in ‘White  
305 Lady’ (S3 Fig.), while 243 Kb mostly repetitive sequences were mapped to other regions of  
306 the Phureja genome. Interestingly, 313 Kb did not map at all to the Phureja reference genome.

307 Sequences of 13 out of the 16 *Ry<sub>sto</sub>* locus-specific primers co-segregating with the  
308 *Ry<sub>sto</sub>*-provided extreme PVY<sup>NTN</sup> resistance (Fig. 1) possessed 100% identity with the

309 corresponding BAC clone sequences and only 1-2 bp difference was detected in the case of  
310 the other three primers (S5 Fig.) indicating that all six BAC clones were originated from the  
311 *Ry<sub>sto</sub>*-bearing chromosome.

312 The end regions between the six sequenced BAC clones were examined pair-wise. As  
313 expected, the 443B9, 109D9 and 154G1 BAC clones showed 100% identity in the  
314 overlapping regions. Unfortunately, the overlapping region between the 154G1 and 164H4  
315 BAC clones was restricted only to 8 bp including a *Hind*III site, which served as the cloning  
316 site during generation of the BAC library. In order to demonstrate the adjacent position of the  
317 two BAC clones a primer pair complementary to the corresponding ends of 154G1 and 164H4  
318 was designed and used in PCR with ‘White Lady’ genomic DNA as a template. The reaction  
319 resulted in an approximately 0.45 kb PCR product as it was visualised on an agarose gel. The  
320 PCR product was cloned and Sanger-sequenced. Clones representing all four chromosomes  
321 were obtained with no additional sequences compared to the 8-bp overlap between 154G1 and  
322 164G1 (S4 Fig.) indicating that 154G1 and 164H4 represent a continuous fragment of the  
323 *Ry<sub>sto</sub>* locus. On the other side, the end of the 164H4 BAC clone showed 100% identity with  
324 the overlapping 156F6 contigs. The 156F6 BAC clone, however, did not overlap with the  
325 626B1 contigs. Although, the BWA-MEM alignment showed high similarity between the two  
326 BAC ends (S3 Fig.), the NCBI BLAST revealed that the similarity was due to the presence of  
327 *NLR* homologous sequences of truncated genes on the tested scaffolds, while their very ends  
328 were different.

329 Based on DNA sequence comparison to the annotated Phureja genome and searches in  
330 the NCBI database, eight genes were assigned to the *NLR* family. Seven *NLR* genes were  
331 located on the BAC clone 156F6 and one on 626B1. *NLR* genes can be divided into two  
332 subclasses: one includes genes whose proteins contain a coiled-coil (CC) motif at their N-  
333 terminus, and the other includes genes whose proteins resemble the Toll-interleukin receptor  
334 (TIR) domain at the N-terminus [10]. One out of the eight *NLR* genes that we identified was a  
335 *CC-type* disease resistance gene encoding a protein 97% identical to the predicted disease  
336 resistance RPP8-like protein 2 of potato (S6 Fig.). Since this gene carried the DisRes marker  
337 we kept the name *DisRes* for the *RPP8*-like gene located on BAC clone 156F6. The other  
338 seven putative resistance genes belonged to the *TIR-type NLR* genes. These included four  
339 genes encoding proteins similar to the phloem protein A5-like. Nevertheless, one out of the  
340 four genes that we identified (*Phloem3*) may not be functional because it encodes an N-  
341 terminal-truncated protein and involves four stop codons. The other three genes, *Phloem 1, 2*  
342 and *4*, encoded 77-87% identical proteins (S7 Fig.). The other three *TIR-type NLR* genes were

343 similar to the *N*-like *TMV resistance* gene isolated from tobacco (S8 Fig.). Thus, these genes  
344 were designated *TMV1*, *TMV2* and *TMV3*. The predicted proteins *TMV2* and *TMV3*  
345 possessed 80% identity at the amino acid sequence level. *TMV1*, however, similar to  
346 *Phloem3*, may not be functional because it encodes an N-terminal-truncated protein (S8 Fig.).

347 Vidal et al. [17] cloned and characterised *Y-1* that co-segregated with *Ry<sub>adg</sub>*, a gene for  
348 ER to PVY on chromosome XI and found it also structurally similar to the *N*-like *TMV*  
349 *resistance* gene isolated from tobacco. Therefore, we tested the similarities between *Y-1* and  
350 the *TMVs* isolated from ‘White Lady’. The highest identity, 42%, was detected between *Y-1*  
351 and *TMV2* (S9 Fig.). Recently, Grech-Baran et al. [42] published the genomic sequence of a  
352 *TIR-NLR* immune receptor identified as *Ry<sub>sto</sub>* in a dihaploid clone of the cultivar “Alicja”,  
353 which has PVY resistance also from *S. stoloniferum* in its ancestry. Comparison of the two  
354 genomic sequences from the putative start and stop codons of the genes revealed 95% identity  
355 between *TMV2* and *Ry<sub>sto</sub>* (S10 Fig.).

356

#### 357 **Cloning and functional testing of *Ry<sub>sto</sub>* candidates**

358

359 The putative resistance genes were subcloned from the BAC clone 156F6 into the  
360 binary vector pBin19 for *Agrobacterium*-mediated transformation of the PVY susceptible  
361 potato cultivars ‘Désirée’ and ‘S440’. Six genes of interest with 0.4-1.9 kb untranslated 5’  
362 regions were PCR-amplified with a high fidelity DNA polymerase and inserted into pBin19.  
363 *TMV2*, *TMV3* and *DisRes* were cloned separately, resulting in the constructs T2, T3 and DR,  
364 while *Phloem* genes were cloned in pairs, resulting in the constructs P1-2 and P3-4 (Fig 4).

365

366 **Fig. 4. Schematic representation of the putative *NLR* resistance genes on the BAC clone**  
367 **156F6 and the constructs used for transformation with the number of transgenic lines**  
368 **tested for virus resistance.** Red arrows indicate the coding regions of the genes with introns  
369 and their direction of transcription. Green lines represent the non-coding regions. The  
370 genomic fragments were cloned in the binary vector pBIN19 and transformed into the PVY-  
371 sensitive potato cultivar ‘Désirée’ and ‘S440’. Symbols: P, *phloem protein-coding* gene; DR  
372 *disease resistance* gene; T, *TMV resistance* gene; D, ‘Désirée’; S, ‘S440’.

373

374 Twenty to forty ‘Désirée’ leaves per construct were transformed and 80-100 plants  
375 regenerated and rooted on selective media indicating that the transformations were efficient.  
376 Twelve independent putative transgenic plants (i.e., plants regenerated from different leaves)

377 derived from the transformation with P1-2 and P3-4 each, and 20, 24 and 30 plants from the  
 378 transformation with *TMV2*, *TMV3* and *DisRes*, respectively, were isolated. To test for the  
 379 presence of ‘White Lady’-derived genes in the putative transgenic plants gene-specific  
 380 primers were developed (Table 1 and Fig. 5). DNA was isolated from *in vitro* grown P1-2,  
 381 P3-4, DR and T3 plants and the gene-specific primers were used for PCR amplification of  
 382 *NLR* fragments. In this way, 10 P1-2, 12 P3-4, 27 DR and 18 T3 lines were selected. In the  
 383 case of *TMV2* no primer pair distinguishing between the corresponding ‘White Lady’ and  
 384 ‘Désirée’ gene could be identified. Nevertheless, with a primer pair designed for *TMV2* cDNA  
 385 (Table 1) a difference in expression level of the gene was detected (Fig. 6). Thus in the case  
 386 of T2 lines, RNA was isolated from the leaves, and RT-PCR was used to identify the 17  
 387 ‘Désirée’ transgenic lines expressing *TMV2*. Attempts were made to detect the expression of  
 388 the other transgenes as well, however, due to the high level of homology (S6,7 Fig.) no  
 389 cultivar-specific primers for the *phloem protein-like* and *DisRes* transcripts could be designed,  
 390 while in the case of *TMV3* the level of expression was very low even in ‘White Lady’.

391  
 392  
 393  
 394  
 395  
 396  
 397  
 398

Table 1

*NLR* gene-specific markers of the *Ry<sub>sto</sub>* locus

\*An initial denaturation of 5’ at 95°C and a final extended elongation period of 10’ at 72°C were used in each case. Termination of the reaction was achieved by chilling the mixture to 4°C.

| Names        | Primers (5’→3’)                                    | Types  | Cycling conditions*                           |
|--------------|----------------------------------------------------|--------|-----------------------------------------------|
| DisRes       | ACGCGCAAGAAGGACGTGTGT<br>AGCTCAACGCGAGGACACCAT     | PCR    | [95 °C 30’’, 63 °C 30’’, 72 °C 1’]<br>x 34    |
| Phloem1.spec | CTTATCCAGACGAGGTCAA<br>CAAATGCATCCCTCCATCTT        | PCR    | [95 °C 30’’, 51 °C 30’’, 72 °C 1’]<br>x 34    |
| Phloem4.spec | TGCATCGTCAAAATGGTGTT<br>TGTGCCTTTTATGTTTTCTT       | PCR    | [95 °C 30’’, 50 °C 30’’, 72 °C 1’40’]<br>x 36 |
| TMV3.spec    | GCTTCCACTTACATCCAACCTTT<br>ACAGCTCGCTATGCTTTGTTT   | PCR    | [95 °C 30’’, 56 °C 30’’, 72 °C 1’]<br>x 34    |
| TMV2.spec    | GATGTCAAGGACGATAAACCTG<br>TAAGAGAAATGGGAGAAAATGTCA | RT-PCR | [95 °C 30’’, 54 °C 30’’, 72 °C 1’40’]<br>x 36 |

399 **Fig. 5. *NLR*-specific markers tightly linked to the *Ry<sub>sto</sub>* gene as detected on agarose gel.**  
400 WL, ‘White Lady’; D, ‘Désirée’; S, ‘S440’. PCR fragments were generated from genomic  
401 DNA with the primer pairs presented in Table 1.

402

403 To test the virus sensitivity of the transgenic plants the selected lines were propagated  
404 *in vitro*, planted in pots and inoculated with PVY<sup>NTN</sup> under greenhouse conditions.  
405 Unfortunately, none of the transgenic ‘Désirée’ lines proved to be virus resistant in repeated  
406 experiments. The example of a few TMV2 transgenic lines is shown in Fig. 6.

407

408 **Fig. 6. Detection of *TMV2* expression and PVY<sup>NTN</sup> in ‘Désirée’ plants transformed with**  
409 **the T2 construct.** RNA was isolated from the upper leaves of plants three weeks after viral  
410 infection of bottom leaves. RT-PCR fragments were generated with *TMV2*- and *PVY coat*  
411 *protein* gene-specific primers and separated on agarose gels. Lines 1, 3 and 4 were considered  
412 positive, while line 2 was considered negative for the expression of the transgene. Symbols:  
413 WL, ‘White Lady’; D, ‘Désirée’.

414

415 An attempt was made to introduce *TMV2* and *TMV3* not only into ‘Désirée’ but also  
416 into ‘S440’. Nevertheless, leaf transformation using the same method used for ‘Désirée’ failed  
417 for ‘S440’. Therefore, sterile ‘S440’ microtubers were obtained from *in vitro* plants and  
418 transformed with T2 and T3 constructs. Seventeen T2 and three T3 transgenic lines were  
419 isolated and subjected to virus testing, but no significant resistance to PVY<sup>NTN</sup> was observed.

420

421

## 422 **Discussion**

423

424 The *Ry<sub>sto</sub>* gene from *S. stoloniferum* was originally introgressed into the widely used  
425 breeding clone MPI 61.303/34. *Ry<sub>sto</sub>*-based virus resistance has proven quite durable and is  
426 used in breeding programmes throughout the world. For example, this gene provides  
427 resistance against several viruses in the cultivars ‘Bzura’, ‘Forelle’, ‘Pirola’, and ‘White  
428 Lady’ [43], the last of which is the object of this study.

429 Our result supported the previous finding [16] that the *Ry<sub>sto</sub>* gene in ‘White Lady’ is  
430 located on chromosome XII and linked to STM0003 and YES3-3A, the markers widely used  
431 for marker-assisted selection in breeding programmes [44,45]. Because *Ry-f<sub>sto</sub>* mapped by Flis



432 et al. [14] and Song et al. [15] is also linked to STM0003 and YES3-3A, there is a possibility  
433 that the  $Ry_{sto}$  gene in ‘White Lady’ and  $Ry-f_{sto}$  have the same source.

434 In addition to the abovementioned publications, some other studies also supported the  
435 location of  $Ry_{sto}$  on the distal end of chromosome XII [21,46,47]. To the best of our  
436 knowledge, however, the genetic map presented in Fig. 2 is the most detailed map of the  $Ry_{sto}$   
437 locus published so far. Sequencing the PCR fragments of ‘White Lady’ generated by ST1 and  
438 YES3-3A primers identified two supercontigs as a putative region surrounding  $Ry_{sto}$  and  
439 resulted in the isolation of a new marker, SGN-U256066, located between STM0003 and  
440 YES3-3A. Combining the genetic map with genomic sequence data of the *S. tuberosum*  
441 Group Phureja, the size of the  $Ry_{sto}$  locus was narrowed down to approximately 1 Mb. BAC  
442 clones of ‘White Lady’ overlapping the  $Ry_{sto}$  locus were isolated by chromosome walking.  
443 Markers 1.365, 1.156, 1.110 and 1.109 were designed to the BAC clone ends and used in  
444 walking. For the identification of two additional markers, Sec15 and DisRes, the intron  
445 targeting (IT) method was applied. This method is based on the observation that intron  
446 sequences are generally less conserved than exons, and they display polymorphism due to  
447 length and/or nucleotide variation in their alleles. Effective strategies for exploiting this  
448 information and generating IT markers have already been developed and successfully applied  
449 for many plant species, including potato [31,48].

450 By annotating the  $Ry_{sto}$  locus sequence, one putative *CC-type* and seven *TIR-type NLR*  
451 genes were identified, of which five appeared to encode full-length proteins. A genome-wide  
452 genetic mapping of *NLR* disease resistance loci in the diploid potato clone RH89-039-16 (*S.*  
453 *tuberosum* ssp. *tuberosum*) resulted in the detection of 738 partial- and full-length resistance  
454 gene homologues [46]. A very similar result was obtained by resistance gene enrichment  
455 sequencing (RenSeq), which detected 755 *NLRs* in the sequenced *S. tuberosum* genome [49].  
456 Nevertheless, the function of most of these genes is unknown. In our case, however, the *CC-*  
457 *type NLR* was similar to *RPP8*, a gene of *Arabidopsis thaliana* providing resistance to  
458 *Peronospora parasitica* [50]. In addition, three genes encoding full-length proteins similar to  
459 phloem protein A5-like were identified. It was shown earlier that many phloem proteins have  
460 roles in wound and defence responses [51]. Two genes encoding full-length proteins were  
461 similar to TMV resistance proteins in tobacco [52] and Y-1 characterising an ER with *S.*  
462 *andigena* origin in potato [17]. One of these genes, *TMV2*, showed 95% identity with the  
463 recently isolated  $Ry_{sto}$  gene of the dihaploid clone dH ‘Alicja’ at genomic DNA sequence  
464 level [42].



465 Implication of the *CC-type NLR* gene *DisRes* and the five *TIR-type NLR* genes,  
466 *Phloem 1, 2, 4* and *TMV2, 3*, in ER was tested by introducing the genes into the PVY-  
467 sensitive potato cultivar ‘Désirée’ and expressing the genes using their own putative  
468 promoter. The presence of the *NLR* genes derived from ‘White Lady’ was demonstrated in  
469 transgenic lines selected for virus resistance testing; however, the expression of *TMV2* only  
470 could be tested in transgenic plants due to the absence of *phloem protein-like* and *DisRes*  
471 cDNA-specific primers and the very low level of expression of *TMV3* in ‘White Lady’. None  
472 of the transgenic lines, however, became PVY<sup>NTN</sup> resistant. A similar result was obtained by  
473 [17] while testing *Y-1*, the gene that co-segregated with the ER gene *Ry<sub>adg</sub>*. The transgenic  
474 potato plants of line v2-134 expressing *Y-1* under the control of *CaMV-35S* promoter  
475 developed necrotic lesions upon infection with PVY<sup>O</sup>, but no significant resistance was  
476 observed, and plants were systemically infected with the virus. Thus, it was hypothesised that  
477 the function of *Y-1* is merely to cause a PVY-specific cell death response.

478 In contrast, introduction and expression of a *TIR-NLR* gene derived from ‘Alicja’ and  
479 mapped to the same 58-59-Mbp region of chromosome XII as the *TIR-NLR* genes we  
480 identified transferred ER to two sensitive potato cultivars, ‘Russet Burbank’ and ‘Maris  
481 Piper’. This gene, which was identified as *Ry<sub>sto</sub>* in ‘Alicja’ [42], is 95% identical with *TMV2*  
482 in ‘White Lady’ at genomic sequence level. Even the primer pair used to clone *Ry<sub>sto</sub>* from  
483 ‘Alicja’ may be suitable for cloning *TMV2* from ‘White Lady’ (S10 Fig.). Therefore, it is  
484 highly probable that *TMV2* is the *Ry<sub>sto</sub>* gene in ‘White Lady’. Nevertheless, expression of  
485 *TMV2* did not confer ER neither to transgenic ‘Désirée’ nor to ‘S440’ lines. Although a high-  
486 fidelity DNA polymerase was used to amplify *TMV2* from the ‘White Lady’ genome a  
487 mismatch caused by the enzyme could result in the loss of function of the gene. An alternative  
488 explanation might be the high frequency of chimera formation generated by *Agrobacterium*-  
489 mediated transformation and regeneration from calluses [53]. Since a slightly different  
490 transformation technique was used by Grech-Baran et al. [42] and us, and the frequency of  
491 chimera formation may be different in various potato cultivars, these factors could result in a  
492 difference in the frequency of chimera formation. Since chimeras have untransformed cells  
493 the viruses could spread and multiply in these cells masking the resistant phenotype of the  
494 transgenic cells when testing the plants for the presence of the virus by RT-PCR. It should be  
495 noted, however, that based on DNA sequence analysis there is a gap between the BAC clones  
496 156F6 and 626B1 in our map. Thus, the presence of a functional gene corresponding to *Ry<sub>sto</sub>*  
497 and located in the uncovered region cannot be excluded either.

498 Marker-assisted selection (MAS) has already been routinely employed in crop  
499 breeding programmes to accelerate cultivar development. With selection for virus resistance  
500 in the juvenile phase and parental selection prior to crossing, breeding time and costs can be  
501 reduced. In this work, we discovered five new markers very tightly linked to *Ry<sub>sto</sub>*, which  
502 showed polymorphism between the *Ry<sub>sto</sub>* bearing potato cv. ‘White Lady’ and the virus  
503 sensitive ‘Désirée’ and ‘S440’ (Fig. 5 and 6). In addition to the markers identified earlier,  
504 these markers can serve potato breeding efforts for extreme virus resistance.

505

## 506 **Supporting information**

507 **File S1** S1 Table. List of primers.

508 (pdf)

509 **File S2 Supplementary figures. S1 Fig.** DNA sequence of ST1; **S2 Fig.** DNA sequence of  
510 YES3-3A; **S3 Fig.** Alignment of BAC clone sequences to Phureja sequence; **S4 Fig.** End  
511 sequences of the BAC clones 154G1 and 164H4; **S5 Fig.** DNA sequence identity of the *Ry<sub>sto</sub>*  
512 region specific primers with the corresponding BAC clone sequences; **S6 Fig.** Amino acid  
513 alignment of DisRes with RPP8-like protein 2; **S7 Fig.** Amino acid alignment of phloem  
514 proteins; **S8 Fig.** Amino acid alignment of TMV resistance proteins; **S9 Fig.** Amino acid  
515 alignment of TMV2 with Y-1; **S10 Fig.** DNA sequence alignment of the *TMV2* genomic  
516 region of ‘White Lady’ and the *Ry<sub>sto</sub>* region of dH ‘Alicja’.

517 (pdf)

518

## 519 **Acknowledgements**

520 The authors are grateful to M. Kiss for the excellent technical help in propagation and  
521 transformation of potato plants.

522

523

524 **References**

- 525 1. Jones JD, Witek K, Verweij W, Jupe F, Cooke D, Dorling S, et al. Elevating crop disease  
526 resistance with cloned genes. *Philos Trans R Soc Lond B Biol Sci.* 2014;369: 20130087.
- 527 2. Palukaitis P. Resistance to viruses of potato and their vectors. *Plant Pathol J.* 2012;28: 248-  
528 258.
- 529 3. Muthamilarasan M, Prasad M. Plant innate immunity: an updated insight into defense  
530 mechanism. *J Biosci.* 2013;38: 433-449.
- 531 4. Kopp A, Kondrák M, Bánfalvi Z. Molecular mechanisms of resistance to *Potato virus X*  
532 and *Y* in potato. *Acta Physiol Entomol Hung.* 2015;50: 151-160.
- 533 5. Solomon-Blackburn RM, Barker H. A review of host major-gene resistance to potato  
534 viruses X, Y, A and V in potato: genes, genetics and mapped locations. *Heredity (Edinb).*  
535 2001;86: 8-16.
- 536 6. Ritter E, Debener T, Barone A, Salamini F, Gebhardt C. RFLP mapping on potato  
537 chromosomes of two genes controlling extreme resistance to potato virus X (PVX). *Mol*  
538 *Gen Genet.* 1991;227: 81-85.
- 539 7. Bendahmane A, Kanyuka K, Baulcombe DC. The *Rx* gene from potato controls separate  
540 virus resistance and cell death responses. *Plant Cell.* 1999;11: 781-791.
- 541 8. Bendahmane A, Querci M, Kanyuka K, Baulcombe DC. *Agrobacterium* transient  
542 expression system as a tool for the isolation of disease resistance genes: application to the  
543 *Rx2* locus in potato. *Plant J.* 2000;21: 73-81.
- 544 9. van der Vossen EA, van der Voort JN, Kanyuka K, Bendahmane A, Sandbrink H,  
545 Baulcombe DC, et al. Homologues of a single resistance-gene cluster in potato confer  
546 resistance to distinct pathogens: a virus and a nematode. *Plant J.* 2000;23: 567-576.
- 547 10. Sukarta OC, Slootweg EJ, Goverse A. Structure-informed insights for NLR functioning in  
548 plant immunity. *Semin Cell Dev Biol.* 2016;56: 134-149.
- 549 11. Cockerham G. Genetical studies on resistance to Potato viruses X and Y. *Heredity.* 1970;  
550 25: 309-348.
- 551 12. Hamalainen JH, Watanabe KN, Valkonen JPT, Arihara A, Plaisted RL, Pehu E, et al.  
552 Mapping and marker-assisted selection for a gene for extreme resistance to potato virus  
553 Y. *Theor Appl Genet.* 1997;94: 192-197.
- 554 13. Hosaka K, Hosaka Y, Mori M, Maida T, Matsunaga H. Detection of a simplex RAPD  
555 marker linked to resistance to potato virus Y in a tetraploid potato. *Am J Pot Res.*  
556 2001;78: 191-196.

- 557 14. Flis B, Hennig J, Strzelczyk-Zyta DS, Gebhardt C, Marczewski W. The *Ry-f<sub>sto</sub>* gene from  
558 *Solanum stoloniferum* for extreme resistant to Potato virus Y maps to potato chromosome  
559 XII and is diagnosed by PCR marker GP122<sub>718</sub> in PVY resistant potato cultivars. Mol  
560 Breeding. 2005;15: 95-101.
- 561 15. Song Y-S, Hepting L, Schweizer G, Hartl L, Wenzel G, Schwarzfischer A. Mapping of  
562 extreme resistance to PVY (*Ry<sub>(sto)</sub>*) on chromosome XII using anther-culture-derived  
563 primary dihaploid potato lines. Theor Appl Genet. 2005;111: 879-887.
- 564 16. Cernák I, Decsi K, Nagy S, Wolf I, Polgár Z, Gulyás G, et al. Development of a locus-  
565 specific marker and localization of the *Ry<sub>sto</sub>* gene based on linkage to a catalase gene on  
566 chromosome XII in the tetraploid potato genome. Breeding Sci. 2008;58: 309-314.
- 567 17. Vidal S, Cabrera H, Andersson RA, Fredriksson A, Valkonen JP. Potato gene *Y-1* is an *N*  
568 gene homolog that confers cell death upon infection with *potato virus Y*. Mol Plant  
569 Microbe Interact. 2002;15: 717-727.
- 570 18. Lee C, Park J, Hwang I, Park Y, Cheong H. Expression of *G-Ry* derived from the potato  
571 (*Solanum tuberosum* L.) increases PVY<sup>(O)</sup> resistance. J Agric Food Chem. 2010;58:  
572 7245-7251.
- 573 19. Fraile A, García-Arenal F. Environment and evolution modulate plant virus pathogenesis.  
574 Cur Opin Virol. 2016;17: 50-56.
- 575 20. Boualem A, Dogimont C, Bendahmane A. The battle for survival between viruses and  
576 their host plants. Curr Opin Virol. 2016;17: 32-38.
- 577 21. Valkonen, JPT, Wiegmann K, Hämäläinen JH, Marczewski W, Watanabe KN. Evidence  
578 for utility of the same PCR-based markers for selection of extreme resistance to Potato  
579 virus Y controlled by *Ry<sub>sto</sub>* of *Solanum stoloniferum* derived from different sources. Ann  
580 Appl Biol. 2008;152: 121-130.
- 581 22. Davie K, Holmes R, Pickup J, Lacomme C. Dynamics of PVY strains in field grown  
582 potato: Impact of strain competition and ability to overcome host resistance mechanisms.  
583 Virus Res. 2017;241: 95-104.
- 584 23. Horváth S, Wolf I, Polgár Z. Results and importance of resistance breeding against viruses  
585 in Hungary. In Abstracts of International Symposium, Breeding Research on Potatoes,  
586 Rostock Germany, 23-26 June, 1998, Book of Proceedings; 1998; pp. 75-80.
- 587 24. Murashige T, Skoog F. A revised medium for rapid growth and bioassays with tobacco  
588 tissue cultures. Physiol Plant. 1962;15: 473-497.

- 589 25. Deblaere R, Bytebier B, De Greve H, Deboeck F, Schell J, Van Montagu M, et al.  
590 Efficient octopine Ti plasmid-derived vectors for *Agrobacterium*-mediated gene transfer  
591 to plants. Nucl Acids Res. 1985;13: 4777-4788.
- 592 26. Ditta GS, Stanfield D, Corbin D, Helinski DR. Broad host-range DNA cloning system for  
593 gram-negative bacteria: construction of a gene bank of *Rhizobium meliloti*. Proc Natl  
594 Acad Sci USA. 1980;77: 7347-7351.
- 595 27. Dietze J, Blau A, Willmitzer L. *Agrobacterium*-mediated transformation of potato  
596 (*Solanum tuberosum*). In: Potrykus I, Spangenberg G editors, Gene Transfer to Plants.  
597 Springer-Verlag, Berlin; 1995. pp. 24-29.
- 598 28. Stiller I, Dancs G, Hesse H, Hoefgen R, Bánfalvi Z. Improving the nutritive value of  
599 tubers: Elevation of cysteine and glutathione contents in the potato cultivar ‘White Lady’  
600 by marker-free transformation. J Biotechnol. 2007;128: 335-343.
- 601 29. Shure M, Wessler S, Fedoroff N. Molecular identification and isolation of the *Waxy* locus  
602 of maize. Cell. 1983;35: 225-233.
- 603 30. Stiekema WJ, Heidekamp F, Dirkse WG, van Beckum J, de Haan P, Bosch CT, et al.  
604 Molecular cloning and analysis of four potato tuber mRNAs. Plant Mol Biol. 1988;11:  
605 255-269.
- 606 31. Cernák I, Taller J, Wolf I, Fehér E, Babinszky G, Alföldi Z, et al. Analysis of the  
607 applicability of molecular markers linked to the PVY extreme resistance gene *Ry<sub>sto</sub>*, and  
608 the identification of new markers. Acta Biol Hung. 2008;59: 195-203.
- 609 32. Decsi K, Cernák I, Bánfalvi Z, Korom E, Wolf I, Vaszily Z, et al. Marker assisted  
610 selection of the *Solanum stoloniferum* based PVY resistance in the breeding material of  
611 Keszthely. ScienceMED. 2012;3: 215-219.
- 612 33. Song Y-S, Schwarzfischer A. Development of STS markers for selection of extreme  
613 resistance (*Ry<sub>sto</sub>*) to PVY and maternal pedigree analysis of extremely resistant cultivars.  
614 Am J Potato Res. 2008;85: 159-170.
- 615 34. Sambrook J, Fritsch EF, Maniatis T. Molecular Cloning: A Laboratory Manual, 2<sup>nd</sup> edn.  
616 Cold Spring Harbor, New York, Cold Spring Harbor Laboratory; 1989.
- 617 35. Coil D, Jospin G, Darling AE. A5-miseq: an updated pipeline to assemble microbial  
618 genomes from Illumina MiSeq data. Bioinformatics. 2015;31: 587-589.
- 619 36. Potato Genome Sequencing Consortium. Genome sequence and analysis of the tuber crop  
620 potato. Nature. 2011;475: 189-195.
- 621 37. Li H. Aligning sequence reads, clone sequences and assembly contigs with BWA-MEM.  
622 2013;arXiv: 1303.3997.

- 623 38. Bevan M. Binary *Agrobacterium* vectors for plant transformation. *Nucleic Acids Res.*  
624 1984;12: 8711-8721.
- 625 39. Hanahan D. Studies on transformation of *Escherichia coli* with plasmids. *J Mol Biol.*  
626 1983;166: 557-580.
- 627 40. Milbourne D, Meyer RC, Collins AJ, Ramsay LD, Gebhardt C, Waugh R. Isolation,  
628 characterization and mapping of simple sequence repeat loci in potato. *Mol Gen Genet.*  
629 1998;259: 233-245.
- 630 41. The Tomato Genome Consortium. The tomato genome sequence provides insights into  
631 fleshy fruit evolution. *Nature.* 2012;485: 635-641.
- 632 42. Grech-Baran M, Witek K, Szajko K, Witek AI, Morgiewicz K, Wasilewicz-Flis I, et al.  
633 Extreme resistance to *Potato Virus Y* in potato carrying the *Ry<sub>sto</sub>* gene is mediated by a  
634 TIR-NLR immune receptor. *Plant Biotechnol J.* 2019; <https://doi.org/10.1111/pbi.13230>
- 635 43. Ortega F, Lopez-Vizcon C. Application of molecular marker-assisted selection (MAS) for  
636 disease resistance in a practical potato breeding programme. *Potato Res.* 2012; 55:1-13
- 637 44. Fulladolsa AC, Navarro FM, Kota R, Severson K, Palta JP, Charkowski AO. Application  
638 of marker assisted selection for Potato Virus Y resistance in the University of Wisconsin  
639 Potato Breeding Program. *Am J Potato Res.* 2015;92: 444-450.
- 640 45. Nie X, Lalany F, Dickison V, Wilson D, Singh M, De Koeeyer D, et al. Detection of  
641 molecular markers linked to *Ry* genes in potato germplasm for marker-assisted selection  
642 for extreme resistance to PVY in AAFC's potato breeding program. *Can J Plant Sci.*  
643 2016;96: 737-742.
- 644 46. Bakker E, Borm T, Prins P, van der Vossen E, Uenk G, Arens M, et al. A genome-wide  
645 genetic map of NB-LRR disease resistance loci in potato. *Theor Appl Genet.* 2011;123:  
646 493-508.
- 647 47. van Eck HJ, Vos PG, Valkonen JPT, Uitdewilligen JGAML, Lensing H, de Vetten N, et  
648 al. Graphical genotyping as a method to map *Ny<sub>(o,n)sto</sub>* and *Gpa5* using a reference panel  
649 of tetraploid potato cultivars. *Theor Appl Genet.* 2017;130: 515-528.
- 650 48. Poczai P, Cernák I, Gorji AM, Nagy S, Taller J, Polgár Z. Development of intron targeting  
651 (IT) markers for potato and cross-species amplification in *Solanum nigrum* (Solanaceae).  
652 *Am J Bot.* 2010;97: e142-145.
- 653 49. Jupe F, Witek K, Verweij W, Sliwka J, Pritchard L, Etherington GJ, et al. Resistance gene  
654 enrichment sequencing (RenSeq) enables reannotation of the *NB-LRR* gene family from  
655 sequenced plant genomes and rapid mapping of resistance loci in segregating  
656 populations. *Plant J.* 2013;76: 530-544.

- 657 50. McDowell JM, Dhandaydham M, Long TA, Aarts MGM, Goff S, Holub EB, et al.  
658 Intragenic recombination and diversifying selection contribute to the evolution of downy  
659 mildew resistance at the *RPP8* locus of arabidopsis. *Plant Cell*. 1998;10: 1861-1874.
- 660 51. Kehr J. Phloem sap proteins: their identities and potential roles in the interaction between  
661 plants and phloem-feeding insects. *J Exp Bot*. 2006;57: 767-774.
- 662 52. Whitham S, Dinesh-Kumar SP, Choi D, Hehl R, Corr C, Baker B. The product of the  
663 tobacco mosaic virus resistance gene *N*: Similarity to toll and the interleukin-1 receptor.  
664 *Cell*. 1994;78: 1101-1115.
- 665 53. Faize M, Faize L, Burgos L. Using quantitative real-time PCR to detect chimeras in  
666 transgenic tobacco and apricot and to monitor their dissociation. *BMC Biotechnol*.  
667 2010;10: 53.



# Fig. 1

| Geno-<br>type | Pheno-<br>type | Cat-<br>in2 | Cad<br>Ind | Sec<br>15 | 1.109 | ST1 | 1.110 | Dis<br>Res | 1.156 | 1.365 | YES<br>3-3A | SGN | STM<br>0003 |
|---------------|----------------|-------------|------------|-----------|-------|-----|-------|------------|-------|-------|-------------|-----|-------------|
| 61            | R              |             |            |           |       |     |       |            |       |       |             |     |             |
| 39            | S              |             |            |           |       |     |       |            |       |       |             |     |             |
| 7             | S              |             |            |           |       |     |       |            |       |       |             |     |             |
| 118           | S              |             |            |           |       |     |       |            |       |       |             |     |             |
| 56            | S              |             |            |           |       |     |       |            |       |       |             |     |             |
| 18            | S              |             |            |           |       |     |       |            |       |       |             |     |             |
| 73            | S              |             |            |           |       |     |       |            |       |       |             |     |             |

bioRxiv preprint doi: <https://doi.org/10.1101/090452>; this version posted October 17, 2019. The copyright holder for this preprint (which was not certified by peer review) is the author/funder, who has granted bioRxiv a license to display the preprint in perpetuity. It is made available under aCC-BY 4.0 International license.

Fig. 2

bioRxiv preprint doi: <https://doi.org/10.1101/809152>; this version posted October 17, 2019. The copyright holder for this preprint (which was not certified by peer review) is the author/funder, who has granted bioRxiv a license to display the preprint in perpetuity. It is made available under aCC-BY 4.0 International license.

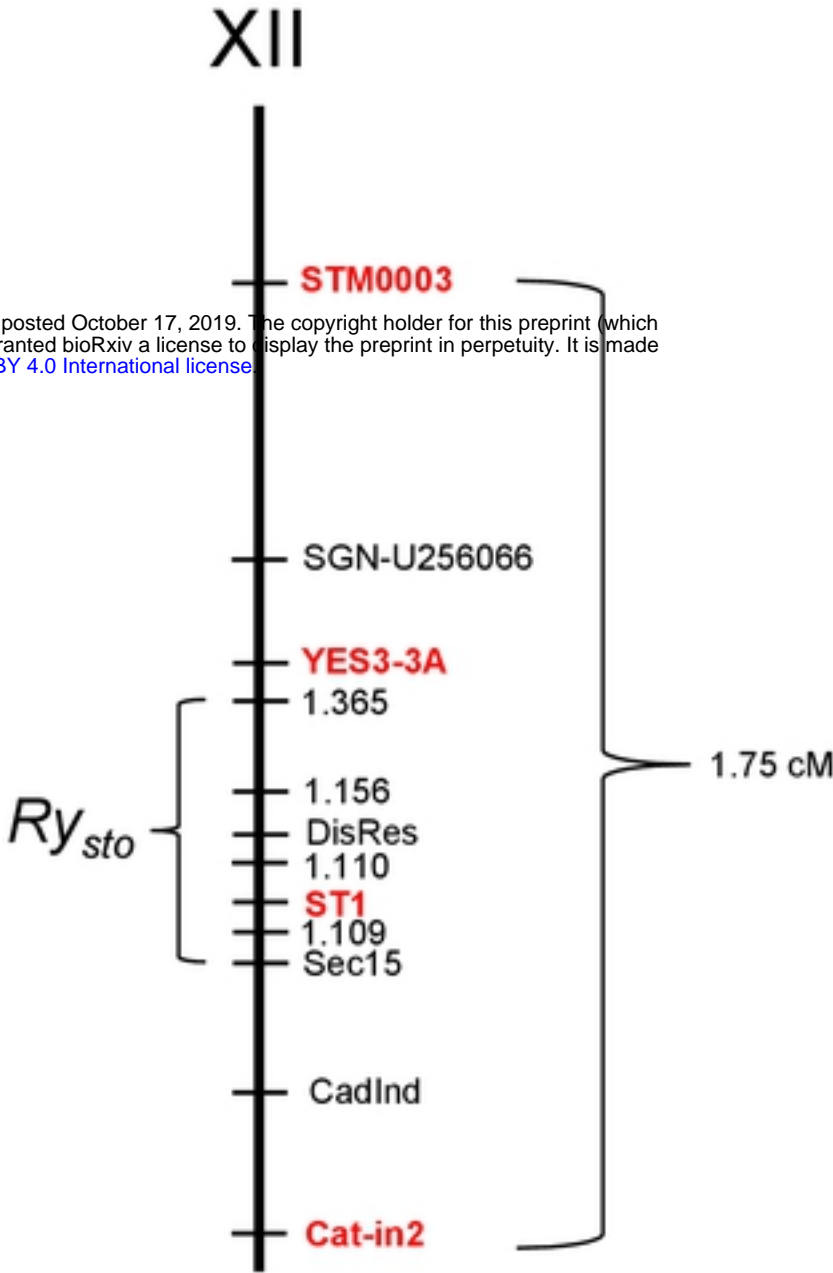

Figure 2

Fig. 3

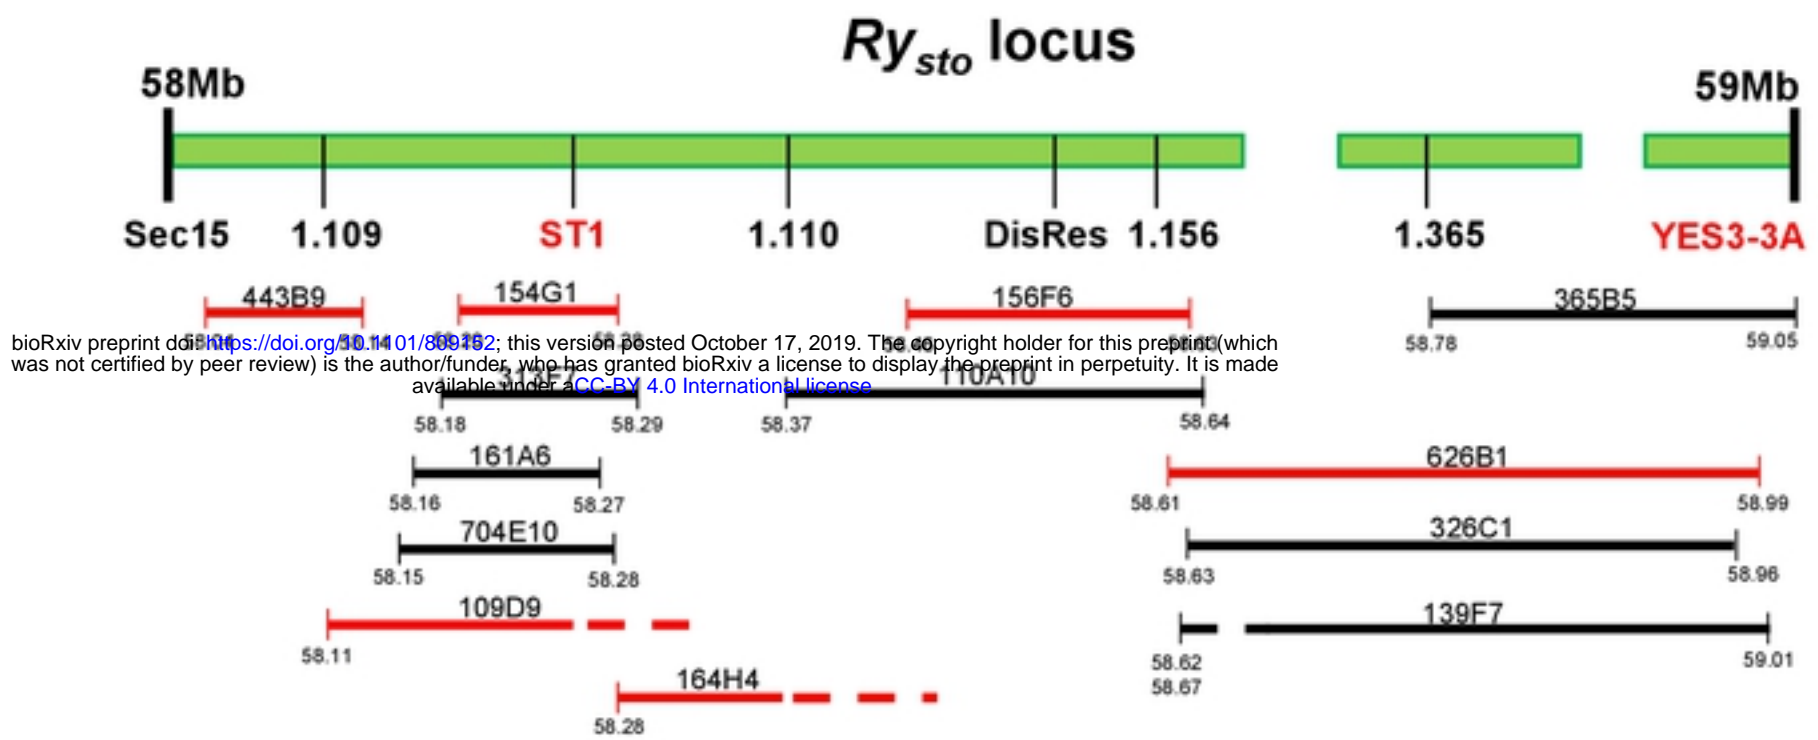

Fig. 4

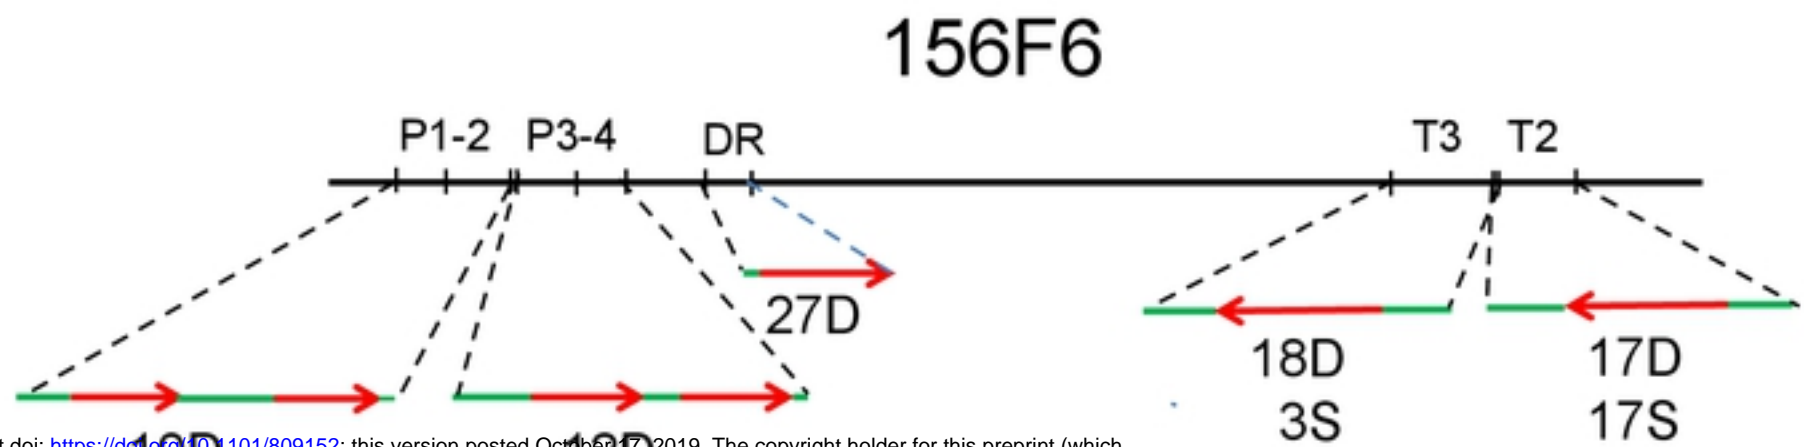

bioRxiv preprint doi: <https://doi.org/10.1101/809152>; this version posted October 17, 2019. The copyright holder for this preprint (which was not certified by peer review) is the author/funder, who has granted bioRxiv a license to display the preprint in perpetuity. It is made available under aCC-BY 4.0 International license.

Fig. 5

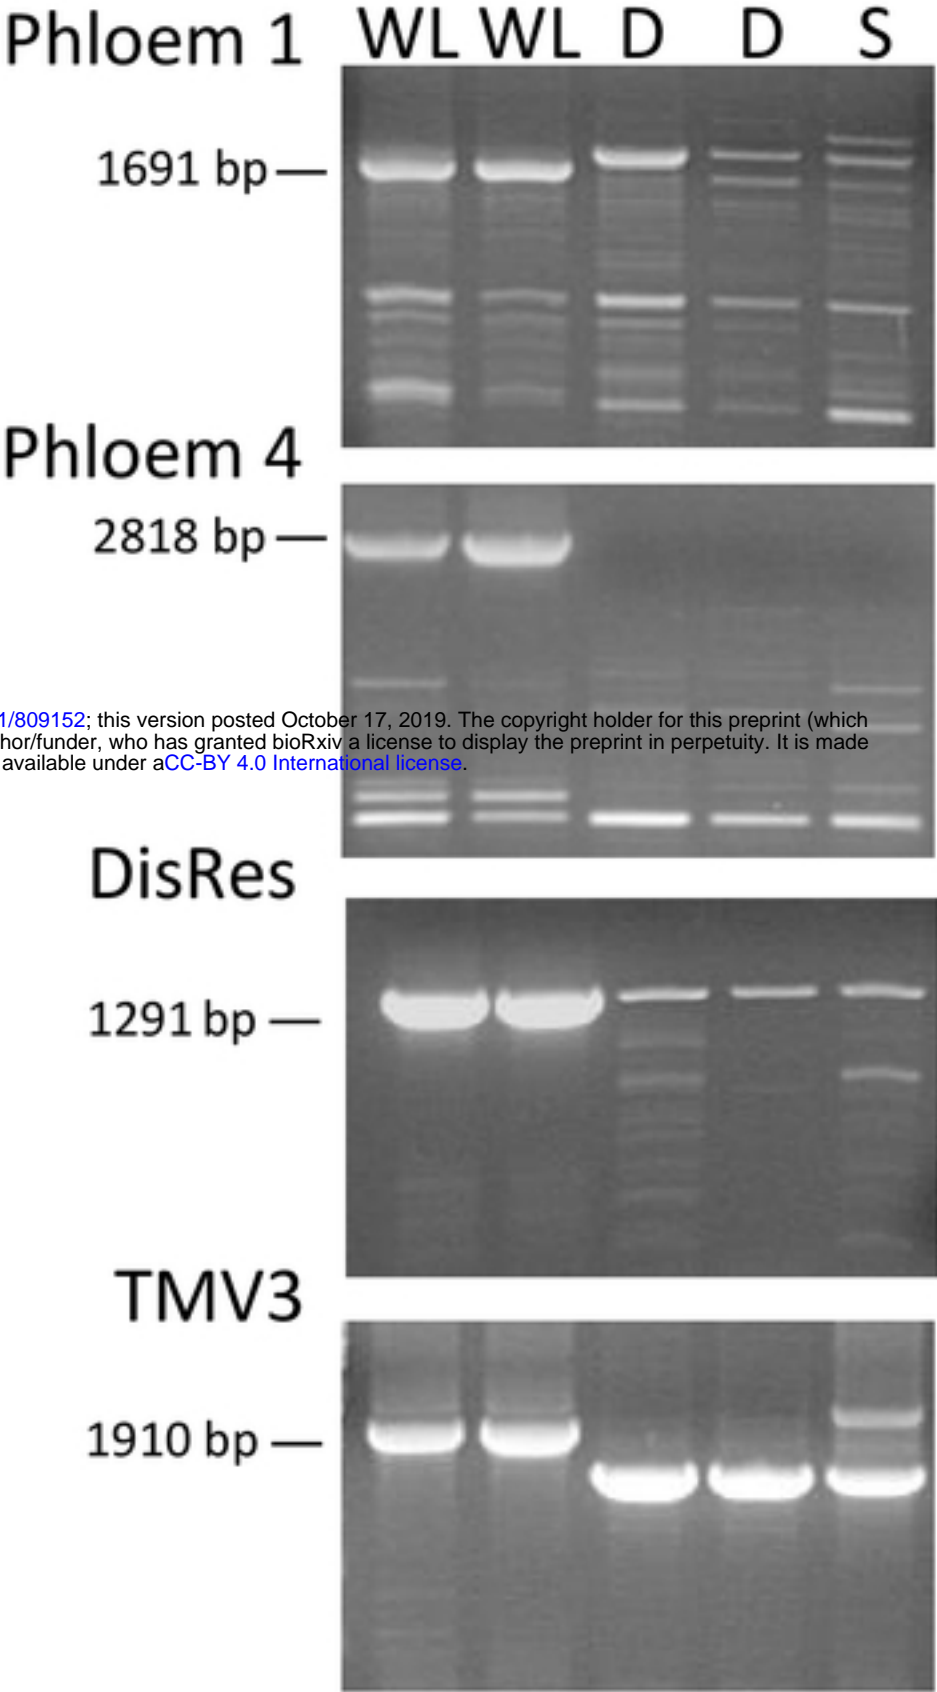

bioRxiv preprint doi: <https://doi.org/10.1101/809152>; this version posted October 17, 2019. The copyright holder for this preprint (which was not certified by peer review) is the author/funder, who has granted bioRxiv a license to display the preprint in perpetuity. It is made available under aCC-BY 4.0 International license.

Fig. 6

bioRxiv preprint doi: <https://doi.org/10.1101/809152>; this version posted October 17, 2019. The copyright holder for this preprint (which was not certified by peer review) is the author/funder, who has granted bioRxiv a license to display the preprint in perpetuity. It is made available under aCC-BY 4.0 International license.

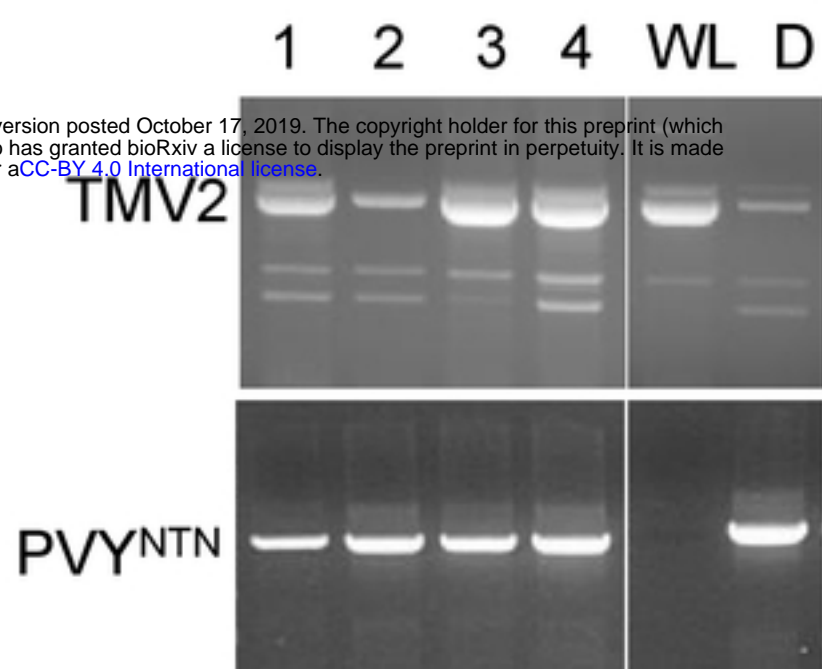

Source: https://biorxiv.org/content/biorxiv/early/2019/10/17/809152.full-text.pdf
